# Supplementary material
Source: PubMed Central journal article supplement (PMC4847750)
Supplement: NIHMS771543-supplement-supp-table1.pdf [file NIHMS771543-supplement-supp-table1.pdf]

**Supplementary Table 1 Comparison of parameters obtained from the global fitting with those obtained from the Im7 mutants that mimic the Im7 folding pathway states**

|                                            | Values from global fitting of kinetic data |                  |                  | Values from Im7 mimic mutants |                           |            |
|--------------------------------------------|--------------------------------------------|------------------|------------------|-------------------------------|---------------------------|------------|
|                                            | Im7 <sub>U</sub>                           | Im7 <sub>I</sub> | Im7 <sub>N</sub> | Im7-L18AL19AL37A <sup>a</sup> | Im7-L53AI54A <sup>b</sup> | Im7-WT     |
| K <sub>d</sub> (μM)                        | 4.7 ± 1.1                                  | 4.7 ± 0.9        | 30.6 ± 4.1       | 10.4 ± 0.2                    | 3.5 ± 0.1                 | 20.5 ± 2.1 |
| Relative fluorescence unbound <sup>c</sup> | 2.10 ± 0.07                                | 3.07 ± 0.12      | 1 ± 0.01         | 1.91                          | 2.98                      | 1          |
| Relative fluorescence bound <sup>c</sup>   | 2.32 ± 0.08                                | 3.07 ± 0.12      | 1.17 ± 0.04      | 2.35                          | 2.98                      | 1.24       |

<sup>a</sup>Mimics Im7<sub>U</sub>

<sup>b</sup>Mimics Im7<sub>I</sub>

<sup>c</sup>Normalized to unbound Im7<sub>N</sub> or unbound Im7-WT
